# Supplementary material for: Taxonomic Status and Composition of the Genera Caulaster, Porcellanaster and Eremicaster (Asteroidea) Based on Juvenile Morphology and Molecular Phylogenetic Data
Source: MDPI journal article supplement (doi:10.3390/d15101032), 2023-09-24
Supplement: s1 [file s1]

Supplement Table S1. Full list of taxa and sequences used in the present study. Accession numbers of the sequences reported for the first time are given in bold.

1- in Genbank as *Styracaster paucispinus*

2 - in Genbank as *Porcellanaster nudus*

3 - in Genbank as *Porcellanaster* cf. *ceruleus*

4 - in Genbank as *Porcellanaster* cf. *ceruleus*

5 - in Genbank as *Porcellanaster* cf. *pedunculatus*

6 - in Genbank as *Styracaster armatus*

| Order       | Family             | Species                                    | Voucher                | COI                   | 16S rRNA        |
|-------------|--------------------|--------------------------------------------|------------------------|-----------------------|-----------------|
| Paxillosida | Porcellanasteridae | <i>Abyssaster paucispinus</i> <sup>1</sup> | NHMUK:MCF<br>185546345 | KU519573              | KU519527        |
|             |                    | <i>Abyssaster tara</i>                     | KB1 2124               | KY908346              | KY908362        |
|             |                    | <i>Caulaster</i> sp.A (1) <sup>2</sup>     | BIO1216                | KY908349              | KY908357        |
|             |                    | <i>Caulaster</i> sp.A (2) <sup>3</sup>     | NHM 168                | KU519568              | -               |
|             |                    | <i>Caulaster</i> sp.A (2) <sup>4</sup>     | NHM 253                | -                     | KU519525        |
|             |                    | <i>Caulaster pedunculatus</i> <sup>5</sup> | AI2169-1/ AI2169-2     | KY908350              | KY908358        |
|             |                    | <b><i>Eremicaster crassus</i></b>          | <b>KB2 085</b>         | <b>OQ866314</b>       | <b>OQ859152</b> |
|             |                    | <i>Eremicaster pacificus</i>               | RBCM EC00029           | HM542928              | -               |
|             |                    | <i>Eremicaster pacificus</i>               | RBCM EC00036           | -                     | HM543144        |
|             |                    | <i>Eremicaster vicinus</i>                 | ErvicLV71-10-8-1       | MW591939              | MW591925        |
|             |                    | <i>Hyphalaster inermis</i>                 | AI1611-1/ AI1611-2     | KY908347              | KY908360        |
|             |                    | <i>Porcellanaster ceruleus</i>             | MR/V386-1/ MR/V386-2   | KY908348              | KY908359        |
|             |                    | <i>Sidonaster vaneyi</i>                   | Ech245                 | EU870027              |                 |
|             |                    | <b><i>Styracaster caroli</i></b>           | Vit-02101              | <b>OQ866315</b>       | <b>OQ859153</b> |
|             |                    | <b><i>Styracaster chuni</i></b>            | JC037-1                | KY908353 <sup>6</sup> | <b>OQ865224</b> |

|                    |                                  |                                    |                 |                 |
|--------------------|----------------------------------|------------------------------------|-----------------|-----------------|
|                    | <i>Styracaster horridus</i>      | Vit-02056                          | <b>OQ866316</b> | <b>OQ859154</b> |
|                    | <i>Styracaster longispinus</i>   | StlonSO223-11-10-1                 | MW591940        | MW591926        |
|                    | <i>Styracaster robustus</i>      | -                                  | KY908354        | KY908361        |
|                    | <i>Styracaster yapensis</i>      | AS040                              | MF582454        | MF595880        |
|                    | <b>Styracaster sp.</b>           | DM-02608                           | <b>OQ866317</b> | <b>OQ859155</b> |
|                    | <i>Thoracaster cylindratus</i>   | Vit39-1                            | KY908351        |                 |
|                    |                                  | Vit39-2                            |                 | KY908363        |
|                    | <i>Vitjazaster djakonovi</i>     | KB223-2/ KB223-4                   | KY908352        | KY908356        |
| Ctenodiscididae    | <i>Ctenodiscus crispatus</i>     | BIOUG<CAN>:HLC-24199/ CASIZ 173281 | HM473909        | EU072940        |
| Pseudarchasteridae | <i>Pseudarchaster alascensis</i> | RBCM EC00145/RBCM EC00143          | HM542963        | HM543149        |
|                    | <i>Pseudarchaster parelii</i>    | Unknown/CASIZ 120380               | AF217384        | EU722965        |
| Luidiidae          | <i>Luidia foliolata</i> 1        | Unknown/CASIZ 105625               | AF217380        | EU072952        |
|                    | <i>Luidia foliolata</i> 2        | NEOCAL07-0114/AMCC 113401          | HM542257        | DQ297097        |
| Astropectinidae    | <i>Astropecten articulatus</i>   | AMCC 113394/Aarti-SCa2             | DQ380242        | FJ177546        |

|                 |                  |                                     |                              |          |          |
|-----------------|------------------|-------------------------------------|------------------------------|----------|----------|
|                 |                  | <i>Astropecten duplicatus</i>       | ACAP024/Adup1-SCa2           | KC626152 | FJ177540 |
|                 |                  | <i>Dipsacaster borealis</i>         | RBCM EC00025/CASIZ<br>143420 | HM400306 | EU722960 |
|                 |                  | <i>Psilaster charcoti</i>           | A02.14T/A04N.04              | GU227097 | GU226974 |
|                 |                  | <i>Psilaster pectinatus</i>         | RBCM EC00040/RBCM<br>EC00044 | HM542973 | HM543150 |
|                 |                  | <i>Thrissacanthias penicillatus</i> | RBCM EC00045/CASIZ<br>115075 | HM542995 | EU722968 |
| Notomyotid<br>a | Benthopectinidae | <i>Benthopecten claviger</i>        | RBCM EC00053/RBCM<br>EC00053 | HM542922 | HM543141 |
|                 |                  | <i>Benthopecten acanthonotus</i>    | RBCM EC00051/RBCM<br>EC00050 | HM542920 | HM543140 |
| Valvatida       | Linckiidae       | <i>Linckia laevigata</i> 1          | BOL_L15/ AMCC<br>114339      | KF834598 | DQ297095 |
|                 |                  | <i>Linckia laevigata</i> 2          | BOL_L20/unknown              | KF834601 | AY279318 |
