# Supplementary material for: Taxonomic Status and Composition of the Genera Caulaster, Porcellanaster and Eremicaster (Asteroidea) Based on Juvenile Morphology and Molecular Phylogenetic Data
Source: MDPI journal article supplement (doi:10.3390/d15101032), 2023-09-24
Supplement: s1 [file s1]

**Table S2.** Estimates of Evolutionary Divergence between Sequences COI of Porcellanasteridae

| Clades                      | Intraspecific |                 | Congeneric and Interspecies |                 |
|-----------------------------|---------------|-----------------|-----------------------------|-----------------|
|                             | Mean          | Range           | Mean                        | Range           |
| Clade I <i>Styracaster</i>  |               |                 | 0.0856                      | 0.0165 – 0.1814 |
| Clade II <i>Eremicaster</i> |               |                 | 0.0688                      | 0.0318 – 0.0942 |
| Clade III <i>Caulaster</i>  | 0.0055        | 0.0000 – 0.0088 |                             |                 |
| Clade IV <i>Hyphalaster</i> |               |                 | 0.1104                      | 0.0000 – 0.1814 |
